# Supplementary material
Source: MDPI journal article supplement (https://www.mdpi.com/2311-5629/4/2/30)
Supplement: s1 [file s1]

## Sheet: A.R Test
			Test of A.R
V =10 ml			A.R - conc. = 20			wt = 10
λ = 530 nm			Temp. = 20 OC			pH = 2
رقم المركب	before	after	ΔA	% E		qe
PES-NH2 in situ 2% AC-COOH	0.892	0.512	0.38	42.6009		8.52018
PES-NH2 in situ 5% AC-COOH	0.892	0.575	0.317	35.5381		7.10762
PES-NH2 in situ 10% AC-COOH	0.892	0.559	0.333	37.3318		7.46637
PES-NH2 in situ 20% AC-COOH	0.892	0.366	0.526	58.9686		11.7937
control	0.892	0.698	0.194	21.7489		4.34978
PES-NH2 ex situ 2% AC-COOH	0.892	0.656	0.236	26.4574		5.29148
PES-NH2 ex situ 5% AC-COOH	0.892	0.562	0.33	36.9955		7.3991
PES-NH2 ex situ 10% AC-COOH	0.892	0.531	0.361	40.4709		8.09417
PES-NH2 ex situ 20% AC-COOH	0.892	0.345	0.547	61.3229		12.2646

## Sheet: M.B 
			Test of M.B
V =10 ml			M.B - conc. = 5			wt = 10
λ = 664 nm			Temp. = 20 OC			pH = 9
رقم المركب	before	after	ΔA	% E
						conc.		qe
PES-NH2 in situ 20% AC-COOH	0.821	0.259	0.562	68.4531		3.42266		3.42266
PES-NH2 ex situ 20% AC-COOH	0.821	0.098	0.723	88.0633		4.40317		4.40317
control SP	0.821	0.543	0.278	33.8611		1.69306		1.69306
			Comparison of qe
comound name	qe
PES-NH2 in situ 20% AC-COOH A.R	11.7937
PES-NH2 in situ 20% AC-COOH M.B	3.42266
PES-NH2 ex situ 20% AC-COOH A.R	12.2646
PES-NH2 ex situ 20% AC-COOH M.B	4.40317
control A.R	4.34978
control M.B	1.69306

## Sheet: Curves 
300	0.417	0.3199	0.1713	0.1806	V =20 ml			A.R - conc. = 20			wt = 20
301	0.4255	0.3257	0.1741	0.184	λ = 530 nm			temp. = 20 OC			time = 75 min
302	0.433	0.3312	0.1769	0.1869
303	0.4391	0.3354	0.1792	0.189
304	0.4442	0.3397	0.1807	0.1912
305	0.4485	0.343	0.182	0.1929
306	0.4508	0.3454	0.1831	0.1936
307	0.4522	0.3459	0.1833	0.1936
308	0.4523	0.346	0.1828	0.1927
309	0.4514	0.345	0.1824	0.1926
310	0.4498	0.344	0.1814	0.1917
311	0.4475	0.3424	0.1799	0.1902
312	0.4454	0.34	0.1784	0.1887
313	0.4431	0.3383	0.1775	0.1874
314	0.4416	0.337	0.1766	0.1864
315	0.4395	0.3352	0.1757	0.1859
316	0.4373	0.3336	0.1744	0.1844
317	0.435	0.3316	0.1731	0.1831
318	0.432	0.3296	0.1721	0.1819
319	0.4286	0.3262	0.17	0.1799
320	0.4239	0.323	0.1682	0.1778
321	0.4189	0.3186	0.166	0.1756
322	0.4125	0.3135	0.1631	0.1726
323	0.4045	0.3072	0.1593	0.1689
324	0.3951	0.3001	0.1561	0.1653
325	0.385	0.292	0.1516	0.1608
326	0.3735	0.2832	0.1468	0.1559
327	0.3612	0.2734	0.1417	0.1505
328	0.3558	0.2709	0.1362	0.1437
329	0.3439	0.2573	0.1304	0.1376
330	0.3281	0.2485	0.1267	0.1313
331	0.3179	0.2391	0.1188	0.1261
332	0.3063	0.2319	0.1178	0.1228
333	0.298	0.2244	0.1121	0.1201
334	0.2896	0.2193	0.1092	0.1154
335	0.2803	0.2136	0.1064	0.113
336	0.2741	0.205	0.1029	0.1082
337	0.2653	0.2008	0.1001	0.1054
338	0.2622	0.1985	0.0989	0.1056
339	0.2565	0.1934	0.0977	0.1025
340	0.2535	0.1907	0.0956	0.101
341	0.249	0.19	0.0941	0.1001
342	0.2447	0.1864	0.093	0.0993
343	0.2448	0.1854	0.0929	0.0972
344	0.2425	0.1828	0.0919	0.0965
345	0.2398	0.1821	0.0911	0.0961
346	0.2395	0.1817	0.0903	0.0967
347	0.2386	0.182	0.0912	0.0954
348	0.2402	0.1819	0.0907	0.096
349	0.2369	0.1805	0.0901	0.095
350	0.2389	0.1813	0.089	0.0943
351	0.2399	0.1804	0.09	0.0971
352	0.2397	0.1828	0.0913	0.0966
353	0.2399	0.1821	0.0913	0.0967
354	0.2408	0.1815	0.0921	0.097
355	0.2414	0.1825	0.0913	0.0968
356	0.2429	0.1835	0.0924	0.0978
357	0.2424	0.1846	0.0921	0.0988
358	0.2425	0.1839	0.0917	0.0974
359	0.2434	0.184	0.0928	0.0985
360	0.2429	0.1852	0.0932	0.0989
361	0.244	0.1852	0.0929	0.0981
362	0.2424	0.1845	0.0923	0.0969
363	0.2442	0.1849	0.0933	0.0979
364	0.2436	0.1839	0.0941	0.0985
365	0.2438	0.1839	0.0924	0.0979
366	0.2432	0.1856	0.0929	0.0981
367	0.2427	0.1849	0.0921	0.098
368	0.241	0.1839	0.0922	0.0977
369	0.2399	0.183	0.0914	0.0968
370	0.24	0.1836	0.093	0.0982
371	0.2376	0.1822	0.0911	0.0967
372	0.2376	0.1814	0.0907	0.0962
373	0.2362	0.1788	0.09	0.0949
374	0.236	0.1776	0.0898	0.0957
375	0.2329	0.177	0.09	0.0944
376	0.2291	0.1756	0.0871	0.0933
377	0.2249	0.1718	0.086	0.0896
378	0.2227	0.1676	0.0845	0.0912
379	0.2224	0.1662	0.0855	0.0909
380	0.2187	0.1643	0.0851	0.0908
381	0.2122	0.1619	0.0795	0.087
382	0.2112	0.1571	0.0768	0.0835
383	0.2033	0.1644	0.082	0.086
384	0.2018	0.1474	0.0841	0.0867
385	0.2113	0.1504	0.0796	0.0904
386	0.2116	0.1637	0.0843	0.0894
387	0.208	0.1606	0.0828	0.088
388	0.2039	0.1579	0.0814	0.0866
389	0.2003	0.1548	0.0801	0.0848
390	0.1966	0.1519	0.0785	0.0834
391	0.1932	0.1493	0.0774	0.082
392	0.1899	0.1469	0.076	0.0808
393	0.1862	0.144	0.0746	0.0792
394	0.1826	0.1412	0.0732	0.0776
395	0.1795	0.1389	0.0721	0.0765
396	0.1762	0.1368	0.071	0.0754
397	0.173	0.134	0.0698	0.0739
398	0.1697	0.1317	0.0688	0.0727
399	0.1669	0.1295	0.0676	0.0716
400	0.1637	0.1273	0.0662	0.0704
401	0.1613	0.1251	0.0652	0.0691
402	0.1586	0.1233	0.0642	0.068
403	0.1566	0.1215	0.0634	0.0672
404	0.1545	0.1202	0.0625	0.0665
405	0.1527	0.1187	0.062	0.0657
406	0.1516	0.1177	0.0616	0.0652
407	0.1501	0.1167	0.0611	0.0646
408	0.1488	0.1159	0.0604	0.064
409	0.148	0.115	0.0602	0.0637
410	0.147	0.1142	0.0596	0.0632
411	0.1468	0.1142	0.0597	0.0631
412	0.1467	0.1141	0.0596	0.0633
413	0.1461	0.1136	0.0594	0.0627
414	0.1452	0.1134	0.0592	0.0626
415	0.145	0.1135	0.0592	0.0624
416	0.1445	0.1132	0.0592	0.0628
417	0.1444	0.1126	0.059	0.0624
418	0.1439	0.1122	0.0585	0.0621
419	0.1442	0.1118	0.0581	0.0615
420	0.1451	0.1116	0.0574	0.0608
421	0.1432	0.1098	0.056	0.0593
422	0.1416	0.1085	0.0551	0.0586
423	0.1427	0.1095	0.0555	0.059
424	0.1446	0.1109	0.0559	0.0595
425	0.1467	0.1123	0.0569	0.0603
426	0.1487	0.114	0.0576	0.061
427	0.1515	0.116	0.0586	0.062
428	0.1546	0.118	0.0596	0.0632
429	0.1577	0.1206	0.0608	0.0644
430	0.1614	0.1234	0.0621	0.066
431	0.165	0.126	0.0636	0.0673
432	0.169	0.1291	0.0649	0.0688
433	0.1736	0.1323	0.0666	0.0704
434	0.1778	0.1355	0.0679	0.0722
435	0.1829	0.1394	0.0696	0.0739
436	0.1877	0.143	0.0714	0.0756
437	0.193	0.1469	0.0734	0.0778
438	0.1985	0.1511	0.0753	0.0796
439	0.2042	0.1554	0.0775	0.0818
440	0.2102	0.1598	0.0795	0.0843
441	0.2164	0.1645	0.082	0.0866
442	0.2228	0.1692	0.084	0.0889
443	0.2296	0.1744	0.0865	0.0915
444	0.2367	0.1797	0.0891	0.0945
445	0.244	0.1851	0.0918	0.0972
446	0.2516	0.1906	0.0943	0.1
447	0.2598	0.1968	0.0975	0.103
448	0.2684	0.2034	0.1005	0.1066
449	0.2776	0.2104	0.1039	0.1101
450	0.2874	0.2177	0.1075	0.1138
451	0.2975	0.2252	0.1112	0.1178
452	0.3083	0.2333	0.115	0.122
453	0.3192	0.2416	0.119	0.1262
454	0.3308	0.2501	0.1233	0.1306
455	0.3426	0.2592	0.1277	0.1352
456	0.355	0.2685	0.1321	0.1401
457	0.3675	0.2778	0.1368	0.1449
458	0.3802	0.2876	0.1416	0.15
459	0.3934	0.2975	0.1463	0.1551
460	0.4066	0.3075	0.1513	0.1603
461	0.42	0.3176	0.1561	0.1655
462	0.4335	0.3278	0.1613	0.1709
463	0.4469	0.3379	0.1662	0.1761
464	0.4598	0.3477	0.171	0.1812
465	0.4732	0.3579	0.176	0.1867
466	0.4863	0.3677	0.1808	0.1918
467	0.4989	0.3775	0.1856	0.1967
468	0.5117	0.3869	0.1905	0.2018
469	0.5243	0.3965	0.1952	0.2068
470	0.5365	0.4058	0.1997	0.2118
471	0.5491	0.4154	0.2042	0.2166
472	0.5615	0.4246	0.209	0.2214
473	0.5735	0.4339	0.2134	0.2262
474	0.586	0.4432	0.2181	0.2313
475	0.5984	0.4525	0.2227	0.236
476	0.6114	0.4622	0.2274	0.2411
477	0.6246	0.4723	0.2323	0.2463
478	0.6382	0.4827	0.2374	0.2517
479	0.6522	0.4931	0.2424	0.2572
480	0.6668	0.5042	0.2479	0.263
481	0.6819	0.5154	0.2535	0.2688
482	0.6974	0.5273	0.2592	0.275
483	0.7133	0.5394	0.2651	0.2813
484	0.73	0.5519	0.2715	0.2878
485	0.7471	0.5648	0.2779	0.2945
486	0.7645	0.578	0.2845	0.3013
487	0.7822	0.5917	0.2912	0.3087
488	0.8	0.6052	0.2978	0.3157
489	0.8173	0.6184	0.3044	0.3227
490	0.8344	0.6317	0.311	0.3296
491	0.8519	0.6447	0.3176	0.3365
492	0.8683	0.6572	0.3238	0.3433
493	0.8841	0.6696	0.3302	0.3498
494	0.8991	0.6811	0.3361	0.356
495	0.9127	0.6916	0.3413	0.3615
496	0.9256	0.7016	0.3464	0.3669
497	0.9367	0.7103	0.3509	0.3717
498	0.9472	0.7183	0.3551	0.3763
499	0.9557	0.7252	0.3588	0.3799
500	0.963	0.7311	0.3618	0.383
501	0.9688	0.7356	0.3642	0.3856
502	0.9734	0.7393	0.3663	0.3877
503	0.9768	0.7416	0.3677	0.3894
504	0.9784	0.7432	0.3685	0.3904
505	0.9792	0.7439	0.3692	0.3909
506	0.9787	0.7439	0.3693	0.3909
507	0.9774	0.7429	0.3689	0.3906
508	0.9754	0.7415	0.3683	0.3901
509	0.9731	0.7397	0.3676	0.3892
510	0.97	0.7378	0.3667	0.3883
511	0.9673	0.7358	0.3659	0.3875
512	0.9646	0.7337	0.3649	0.3866
513	0.9623	0.732	0.3642	0.3856
514	0.9606	0.7308	0.3636	0.3851
515	0.9594	0.73	0.3634	0.3847
516	0.9596	0.7301	0.3633	0.3849
517	0.9598	0.7304	0.3636	0.385
518	0.9614	0.7317	0.3643	0.3856
519	0.9635	0.7334	0.3653	0.3867
520	0.9667	0.7359	0.3664	0.3881
521	0.9702	0.7387	0.3678	0.3895
522	0.9744	0.7419	0.3695	0.3913
523	0.9788	0.7454	0.3713	0.3932
524	0.9834	0.749	0.373	0.395
525	0.9879	0.7523	0.375	0.3969
526	0.9918	0.7556	0.3766	0.3987
527	0.9954	0.7584	0.378	0.4003
528	0.9981	0.7607	0.3792	0.4015
529	0.9998	0.7621	0.38	0.4022
530	1.0003	0.7624	0.3803	0.4026
531	0.9992	0.7619	0.3801	0.4024
532	0.9969	0.7601	0.3793	0.4017
533	0.9923	0.7567	0.3778	0.4001
534	0.9864	0.752	0.3758	0.3979
535	0.9784	0.746	0.3729	0.3947
536	0.9675	0.7383	0.369	0.3907
537	0.9548	0.7285	0.3644	0.3858
538	0.9404	0.7174	0.3592	0.3802
539	0.9228	0.7041	0.3526	0.3732
540	0.9028	0.6891	0.3454	0.3656
541	0.8806	0.6721	0.3371	0.3568
542	0.8559	0.6537	0.328	0.3472
543	0.8288	0.6329	0.3178	0.3362
544	0.7993	0.6105	0.3067	0.3248
545	0.7678	0.5864	0.295	0.3122
546	0.7347	0.5613	0.2826	0.299
547	0.6995	0.5346	0.2694	0.285
548	0.6634	0.5074	0.256	0.2711
549	0.6275	0.48	0.2426	0.2567
550	0.5917	0.453	0.2291	0.2428
551	0.5559	0.4255	0.2156	0.2285
552	0.5207	0.399	0.2023	0.2146
553	0.4868	0.3729	0.1894	0.2006
554	0.4542	0.348	0.177	0.1876
555	0.423	0.324	0.1651	0.1749
556	0.3936	0.3017	0.154	0.1634
557	0.3664	0.2811	0.1437	0.1524
558	0.3398	0.2611	0.1335	0.1418
559	0.3152	0.2424	0.1244	0.1319
560	0.288	0.2222	0.1146	0.1212
561	0.2661	0.2052	0.106	0.1121
562	0.2468	0.1902	0.0985	0.1043
563	0.2284	0.1761	0.0913	0.0967
564	0.2113	0.1631	0.0849	0.0899
565	0.1956	0.1512	0.0789	0.0834
566	0.1808	0.1401	0.073	0.0774
567	0.1675	0.13	0.0682	0.072
568	0.1549	0.1206	0.0633	0.0668
569	0.1437	0.1119	0.0589	0.0623
570	0.133	0.1038	0.0548	0.0581
571	0.1231	0.096	0.0508	0.0538
572	0.1139	0.0891	0.0474	0.05
573	0.1054	0.0825	0.044	0.0465
574	0.0975	0.0767	0.0409	0.0434
575	0.0902	0.071	0.0382	0.0404
576	0.0832	0.0658	0.0355	0.0377
577	0.0772	0.061	0.0328	0.0349
578	0.0715	0.0569	0.0308	0.0328
579	0.0661	0.0527	0.0287	0.0304
580	0.0612	0.049	0.0264	0.0282
581	0.0567	0.0454	0.0248	0.0263
582	0.0525	0.0422	0.0231	0.0244
583	0.0488	0.0394	0.0217	0.023
584	0.0452	0.0365	0.0203	0.0214
585	0.0418	0.0337	0.0188	0.0199
586	0.0387	0.0317	0.0178	0.019
587	0.0359	0.0294	0.0166	0.0176
588	0.0332	0.0272	0.0155	0.0163
589	0.0306	0.0253	0.0144	0.0152
590	0.0285	0.0238	0.0137	0.0143
591	0.0264	0.022	0.0127	0.0135
592	0.0246	0.0206	0.012	0.0127
593	0.0227	0.0191	0.011	0.0118
594	0.0211	0.0179	0.0106	0.0113
595	0.0195	0.0167	0.0101	0.0106
596	0.0181	0.0156	0.0093	0.0099
597	0.0165	0.0144	0.0087	0.0092
598	0.0154	0.0137	0.0081	0.0088
599	0.0142	0.0127	0.0078	0.0081
600	0.0131	0.0119	0.0074	0.0078
601	0.0121	0.0109	0.0069	0.0073
602	0.0111	0.0102	0.0066	0.0069
603	0.0102	0.0095	0.006	0.0065
604	0.0093	0.0089	0.0058	0.0061
605	0.0084	0.0081	0.0054	0.0056
606	0.0081	0.0078	0.0052	0.0053
607	0.0074	0.0071	0.0049	0.0051
608	0.0066	0.0066	0.0045	0.0049
609	0.006	0.0063	0.0043	0.0046
610	0.0056	0.0059	0.004	0.0043
611	0.005	0.0055	0.0039	0.0041
612	0.0048	0.0051	0.0038	0.004
613	0.0043	0.005	0.0036	0.0037
614	0.0038	0.0044	0.0032	0.0036
615	0.0036	0.0043	0.0032	0.0035
616	0.0031	0.004	0.0031	0.0032
617	0.0029	0.0038	0.003	0.0032
618	0.0028	0.0037	0.003	0.0031
619	0.0025	0.0035	0.0029	0.003
620	0.0023	0.0033	0.0028	0.003
621	0.002	0.0032	0.0026	0.0028
622	0.0018	0.003	0.0027	0.0028
623	0.0016	0.0028	0.0024	0.0026
624	0.0015	0.0026	0.0025	0.0027
625	0.0013	0.0026	0.0023	0.0025
626	0.0012	0.0025	0.0024	0.0026
627	0.0011	0.0023	0.0023	0.0023
628	0.0008	0.0023	0.0022	0.0022
629	0.0008	0.0022	0.002	0.0023
630	0.0008	0.0021	0.0022	0.0023
631	0.0006	0.0021	0.0021	0.0022
632	0.0005	0.0021	0.0019	0.0021
633	0.0004	0.0018	0.0019	0.002
634	0.0004	0.0018	0.0018	0.0021
635	0.0003	0.0018	0.0019	0.0021
636	0.0002	0.0017	0.0019	0.002
637	0.0002	0.0018	0.0019	0.0021
638	0.0002	0.0016	0.0018	0.0021
639	0.0001	0.0017	0.0018	0.002
640	0.0002	0.0017	0.0019	0.002
641	0	0.0015	0.0017	0.0018
642	0	0.0014	0.0018	0.0019
643	0	0.0015	0.0017	0.002
644	0	0.0014	0.0018	0.002
645	0	0.0015	0.0018	0.0018
646	0	0.0015	0.0017	0.002
647	0	0.0013	0.0017	0.0019
648	0	0.0014	0.0018	0.0018
649	0	0.0013	0.0017	0.0018
650	0	0.0011	0.0016	0.0018
651	0	0.0012	0.0016	0.0018
652	0	0.0014	0.0017	0.0018
653	0	0.0013	0.0016	0.0017
654	0	0.0013	0.0016	0.0018
655	0	0.0013	0.0016	0.0016
656	0	0.0012	0.0014	0.0017
657	0	0.0011	0.0016	0.0017
658	0	0.0011	0.0016	0.0017
659	0	0.0012	0.0017	0.0018
660	0	0.0012	0.0015	0.0017
661	0	0.0012	0.0016	0.0017
662	0	0.0011	0.0018	0.0017
663	0	0.0011	0.0017	0.0017
664	0	0.0013	0.0018	0.0017
665	0	0.001	0.0016	0.0018
666	0	0.0011	0.0016	0.0017
667	0	0.0012	0.0017	0.0016
668	0	0.0012	0.0016	0.0017
669	0	0.0012	0.0017	0.0017
670	0	0.0012	0.0018	0.0016
671	0	0.0011	0.0016	0.0016
672	0	0.0013	0.0016	0.0018
673	0	0.0011	0.0016	0.0017
674	0	0.0012	0.0016	0.0019
675	0	0.0012	0.0017	0.0018
676	0	0.0012	0.0018	0.0017
677	0	0.0011	0.0015	0.0017
678	0	0.0009	0.0014	0.0016
679	0	0.0012	0.0016	0.0017
680	0	0.0011	0.0013	0.0014
681	0	0.0011	0.0017	0.0017
682	0	0.0012	0.0017	0.0017
683	0	0.0011	0.0015	0.0016
684	0	0.0013	0.0018	0.0018
685	0	0.0009	0.0018	0.002
686	0	0.001	0.0018	0.002
687	0	0.0009	0.0018	0.002
688	0	0.0009	0.0019	0.002
689	0	0.001	0.0018	0.002
690	0	0.001	0.0018	0.002
691	0	0.0009	0.0018	0.0021
692	0	0.0009	0.0019	0.002
693	0	0.001	0.0019	0.002
694	0	0.0008	0.0019	0.002
695	0	0.0009	0.0019	0.002
696	0	0.0008	0.0018	0.002
697	0	0.0009	0.0018	0.002
698	0	0.0009	0.0018	0.002
699	0	0.0009	0.0017	0.002
700	0	0.0008	0.0018	0.002

## Sheet: pH
		Effect of pH
V =20 ml			A.R - conc. = 20			wt = 20
λ = 530 nm			temp. = 20 OC			time = 75 min
		PES-NH2 in situ 20% AC
pH	beffor	after	ΔA		pH	% E
1	1.043	0.423	0.62		1	59.4439
2	1.039	0.431	0.608		2	58.5178
4	1.006	0.645	0.361		4	35.8847
6	0.949	0.786	0.163		6	17.176
8	0.727	0.712	0.015		8	2.06327
10	0.404	0.403	0.001		10	0.247525
		PES-NH2 ex situ 20% AC
pH	beffor	after	ΔA		pH	% E
1	1.043	0.399	0.644		1	61.745
2	1.039	0.395	0.644		2	61.9827
4	1.006	0.591	0.415		4	41.2525
6	0.949	0.744	0.205		6	21.6017
8	0.727	0.709	0.018		8	2.47593
10	0.404	0.403	0.001		10	0.247525

## Sheet: mass
			mass effect
V = 20 ml			A.R - conc. = 20			pH = 1-2
λ = 530 nm			temp. = 20 OC			time = 75 min
2 ml A.R (200 ppm) + 10 ml HCl (0.1M) + 8 ml H2O + x mg of solid phase
	(which x= 10, 15, 20, 25, 30, 40, 50, 60 )
	PES-NH2 in situ 20% AC
mass	before	after	ΔA	% E
10	1.039	0.771	0.268	25.794
15	1.039	0.607	0.432	41.5784
20	1.039	0.424	0.615	59.1915
25	1.039	0.361	0.678	65.2551
30	1.039	0.325	0.714	68.7199
40	1.039	0.252	0.787	75.7459
50	1.039	0.196	0.843	81.1357
60	1.039	0.135	0.904	87.0067
70	1.039	0.076	0.963	92.6853
	PES-NH2 ex situ 20% AC
mass	before	after	ΔA	% E
10	1.039	0.689	0.35	33.6862
15	1.039	0.529	0.51	49.0857
20	1.039	0.389	0.65	62.5602
25	1.039	0.297	0.742	71.4148
30	1.039	0.237	0.802	77.1896
40	1.039	0.161	0.878	84.5043
50	1.039	0.088	0.951	91.5303
60	1.039	0.014	1.025	98.6526
70	1.039	0.009	1.03	99.1338

## Sheet: time
		Effect of time
V = 100 ml		AR - conc. = 20			wt. = 100 mg
λ = 530 nm		temp. = 20 OC			time = 100 min		pH = 1.5
2 ml A.R (1000 ppm) + 48 ml HCl (0.1M) + 50 ml H2O + 100 mg of solid phase
		PES-NH2 in situ 20% AC
time	before	after	ΔA	% E
5	1.029	0.699	0.33	32.07
10	1.029	0.644	0.385	37.415
15	1.029	0.598	0.431	41.8853
20	1.029	0.546	0.483	46.9388
25	1.029	0.491	0.538	52.2838
30	1.029	0.443	0.586	56.9485
40	1.029	0.422	0.607	58.9893
50	1.029	0.408	0.621	60.3499
60	1.029	0.398	0.631	61.3217
70	1.029	0.391	0.638	62.0019
80	1.029	0.38	0.649	63.0709
90	1.029	0.371	0.658	63.9456
100	1.029	0.363	0.666	64.723
		PES-NH2 ex situ 20% AC
time	before	after	ΔA	% E
5	1.029	0.711	0.318	30.9038
10	1.029	0.671	0.358	34.7911
15	1.029	0.633	0.396	38.484
20	1.029	0.597	0.432	41.9825
25	1.029	0.559	0.47	45.6754
30	1.029	0.528	0.501	48.688
40	1.029	0.469	0.56	54.4218
50	1.029	0.416	0.613	59.5724
60	1.029	0.395	0.634	61.6132
70	1.029	0.381	0.648	62.9738
80	1.029	0.371	0.658	63.9456
90	1.029	0.36	0.669	65.0146
100	1.029	0.351	0.678	65.8892
		Control (PES-NH2)
time	before	after	ΔA	% E
5	1.037	0.853	0.184	17.7435
10	1.029	0.834	0.195	18.9504
15	1.029	0.813	0.216	20.9913
20	1.029	0.794	0.235	22.8377
25	1.029	0.786	0.243	23.6152
30	1.029	0.782	0.247	24.0039
40	1.029	0.78	0.249	24.1983
50	1.029	0.779	0.25	24.2954
60	1.029	0.778	0.251	24.3926
70	1.029	0.777	0.252	24.4898
80	1.029	0.777	0.252	24.4898
90	1.029	0.776	0.253	24.587
100	1.029	0.776	0.253	24.587

## Sheet: Temp
			Temp. effect
V = 20 ml		AR - conc. = 20			wt. = 20 mg
λ = 530 nm					time = 75 min		pH = 1.5
2 ml A.R (200 ppm) +8 ml HCl (0.1M) + 10 ml H2O + 20 mg of solid phase
		PES-NH2 in situ 20% AC
Temp.	before	after	ΔA	% E
20	1.041	0.399	0.642	61.6715
35	1.041	0.497	0.544	52.2574
50	1.041	0.621	0.42	40.3458
65	1.041	0.712	0.329	31.6042
		PES-NH2 ex situ 20% AC
Temp.	before	after	ΔA	% E
20	1.041	0.393	0.648	62.2478
35	1.041	0.298	0.743	71.3737
50	1.041	0.231	0.81	77.8098
65	1.041	0.141	0.9	86.4553
		control
Temp.	before	after	ΔA	% E
20	1.037	0.786	0.251	24.2044
35	1.037	0.775	0.262	25.2652
50	1.037	0.765	0.272	26.2295
65	1.037	0.756	0.281	27.0974

## Sheet: Application
			Application of PES-NH2 in situ with 20% AC-COOH
V = 20 ml		AR - conc. = 20			wt. = 80 mg
λ = 530 nm		pH = 1.5			time = 75 min
2 ml A.R (200 ppm) +8 ml HCl (0.1M) + 10 ml sample X + 80 mg of solid phase
	(which X = tap water, Distilled water, and sea water)
	before	after	ΔA	% E
Distilled water	1.038	0.017	1.021	98.3622	99.0366
	before	after	ΔA
Tap water	1.038	0.042	0.996	95.9538	96.3391
	before	after	ΔA
Sea water	1.038	0.084	0.954	91.9075	92.6782
	Application of PES-NH2 ex-situ with 20% AC-COOH
V = 20 ml		AR - conc. = 20			wt. = 70 mg
λ = 530 nm		pH = 1.5			time = 75 min
2 ml A.R (200 ppm) +8 ml HCl (0.1M) + 10 ml sample X + 70 mg of solid phase
	(which X = tap water, Distilled water, and sea water)
				% E
	before	after	ΔA
Distilled water	1.038	0.01	1.028	99.0366
	before	after	ΔA
Tap water	1.038	0.038	1	96.3391
	before	after	ΔA
Sea water	1.038	0.076	0.962	92.6782

## Sheet: kientic in siu
Modified Phase	(G) Weight (mg)	(Clay) Weight (g)	Stand. Volume (mL)	Stand. Volume (L)
PES-NH2 in situ 20% AC	100	0.1	100	0.1
Initial Conc. ppm (mg/L),C0		pH
20		2
					اAdosrbed conc.	Ce=(C0-C) (ppm)
Time	Ab	Aa	% Extraction	% R	C=(C0-Ce) (ppm)	Final Conc. (ppm), Ce
5	1.029	0.699	32.07	67.93	6.41399	13.586
10	1.029	0.644	37.415	62.585	7.48299	12.517
15	1.029	0.598	41.8853	58.1147	8.37707	11.6229
20	1.029	0.546	46.9388	53.0612	9.38776	10.6122
25	1.029	0.491	52.2838	47.7162	10.4568	9.54325
30	1.029	0.443	56.9485	43.0515	11.3897	8.6103
40	1.029	0.422	58.9893	41.0107	11.7979	8.20214
50	1.029	0.408	60.3499	39.6501	12.07	7.93003
60	1.029	0.398	61.3217	38.6783	12.2643	7.73567
70	1.029	0.391	62.0019	37.9981	12.4004	7.59961
80	1.029	0.38	63.0709	36.9291	12.6142	7.38581
90	1.029	0.371	63.9456	36.0544	12.7891	7.21088
100	1.029	0.363	64.723	35.277	12.9446	7.05539
			Adsorbed
			Uptake Capacity (mg/g),qe	log(qe-qt), (mg/g)	t1/2	t/qt
			6.41399	0.814954	2.236	0.779545
			7.48299	0.737321	3.16	1.33636
			8.37707	0.659682	3.872	1.7906
			9.38776	0.551066	4.472	2.13043
			10.4568	0.395825	5	2.3908
			11.3897	0.191705	5.477	2.63396
			11.7979	0.0594666	6.324	3.39044
			12.07	-0.0581729	7.071	4.14251
			12.2643	-0.167317	7.746	4.89223
			12.4004	-0.264227	8.366	5.64498
			12.6142	-0.480936	8.944	6.34206
			12.7891	-0.808295	9.486	7.03723
			12.9446	-1.34301	10	7.72523
			Distribution coefficient (ml/g)		Time	(-logC/C0)
C/C0	(-logC/C0)		Kd,Dc		2.5	0.523112
0.3207	0.493901		472.103		5	0.493901
0.37415	0.426955		597.826		10	0.426955
0.418853	0.377938		720.736		15	0.377938
0.469388	0.328468		884.615		20	0.328468
0.522838	0.281633		1095.72		25	0.281633
0.569485	0.244518		1322.8		30	0.244518
0.589893	0.229227		1438.39		40	0.229227
0.603499	0.219324		1522.06		50	0.219324
0.613217	0.212386		1585.43		60	0.212386
0.620019	0.207595		1631.71		70	0.207595
0.630709	0.200171		1707.89		80	0.200171
0.639456	0.194189		1773.58		90	0.194189
0.64723	0.188941		1834.71		100	0.188941
Pseudo-1st Order Sorption	dq/dt=k1 (qe-qt) -------->	log(qe-qt)= logqe-(k1/2.303)t
Pseudo-2nd Order Sorption	dq/dt=k2 (qo-qt)^2 -------->	t/qt=1/υo+(1/qe)t; υo = k2q2e
	Time	log(qe-qt), (mg/g)						ok
	5	0.814954
	10	0.737321						log (qe − qt ) = log qe − klager t / 2.303
	15	0.659682
	20	0.551066		t1/2 = 1.8 + 0.01
	25	0.395825						log qe = 0.8708
	30	0.191705						qe = 7.43
	40	0.0594666						k = 0.041
	50	-0.0581729
	60	-0.167317
	70	-0.264227
	80	-0.480936
	90	-0.808295
								ok
	t1/2	Uptake Capacity (mg/g), qe
	2.236	6.41399
	3.16	7.48299						qt=Rd(t)1/2
	3.872	8.37707
	4.472	9.38776
	5	10.4568						Rd = 0.307
	5.477	11.3897						Rd =1.536
	6.324	11.7979
	7.071	12.07
	7.746	12.2643
	8.366	12.4004
	8.944	12.6142
	9.486	12.7891
	10	12.9446
	Time	t/qt
	5	0.779545						ok
	10	1.33636
	15	1.7906
	20	2.13043						t/qt= 1/h+ (1/qe)t
	25	2.3908
	30	2.63396						h = k2qe2
	40	3.39044
	50	4.14251						q = 13.95
	60	4.89223						h = 1.72
	70	5.64498						k2 = 8.84 x 10-3
	80	6.34206
	90	7.03723
	100	7.72523
		qt
Time	ln t	Uptake Capacity (mg/g), qe
5	1.60944	6.41399						ok
10	2.30259	7.48299
15	2.70805	8.37707						qt=β ln⁡(αβ)+ β ln⁡t
20	2.99573	9.38776
25	3.21888	10.4568
30	3.4012	11.3897						β = 2.345
40	3.68888	11.7979						α = 1.12
50	3.91202	12.07
60	4.09434	12.2643
70	4.2485	12.4004
80	4.38203	12.6142
90	4.49981	12.7891
100	4.60517	12.9446

## Sheet: kientic ex
Modified Phase	(G) Weight (mg)	(Clay) Weight (g)	Stand. Volume (mL)	Stand. Volume (L)
PES-NH2 ex situ 20% AC	100	0.1	100	0.1
Initial Conc. ppm (mg/L),C0		pH
20		2
					Adosrbed conc.	Ce=(C0-C) (ppm)
Time	Ab	Aa	% Extraction	% R	C=(C0-Ce) (ppm)	Final Conc. (ppm), Ce
5	1.029	0.711	30.9038	69.0962	6.18076	13.8192
10	1.029	0.671	34.7911	65.2089	6.95821	13.0418
15	1.029	0.633	38.484	61.516	7.69679	12.3032
20	1.029	0.597	41.9825	58.0175	8.3965	11.6035
25	1.029	0.559	45.6754	54.3246	9.13508	10.8649
30	1.029	0.528	48.688	51.312	9.73761	10.2624
40	1.029	0.469	54.4218	45.5782	10.8844	9.11565
50	1.029	0.416	59.5724	40.4276	11.9145	8.08552
60	1.029	0.395	61.6132	38.3868	12.3226	7.67736
70	1.029	0.381	62.9738	37.0262	12.5948	7.40525
80	1.029	0.371	63.9456	36.0544	12.7891	7.21088
90	1.029	0.36	65.0146	34.9854	13.0029	6.99708
100	1.029	0.351	65.8892	34.1108	13.1778	6.82216
			Adsorbed
			Uptake Capacity (mg/g),qe	log(qe-qt), (mg/g)	t1/2	t/qt
			6.18076	0.844917	2.236	0.808962
			6.95821	0.793765	3.16	1.43715
			7.69679	0.738864	3.872	1.94886
			8.3965	0.67955	4.472	2.38194
			9.13508	0.606678	5	2.7367
			9.73761	0.536588	5.477	3.08084
			10.8844	0.360497	6.324	3.675
			11.9145	0.101528	7.071	4.19657
			12.3226	-0.0679327	7.746	4.86909
			12.5948	-0.234264	8.366	5.55787
			12.7891	-0.410355	8.944	6.25532
			13.0029	-0.757143	9.486	6.92152
			13.1778	-1.65448	10	7.5885
			Distribution coefficient (ml/g)		Time	(-logC/C0)
C/C0	(-logC/C0)		Kd,Dc		2.5	0.533113
0.309038	0.509988		447.257		5	0.509988
0.347911	0.458532		533.532		10	0.458532
0.38484	0.41472		625.592		15	0.41472
0.419825	0.376932		723.618		20	0.376932
0.456754	0.340318		840.787		25	0.340318
0.48688	0.312578		948.864		30	0.312578
0.544218	0.264227		1194.03		40	0.264227
0.595724	0.224955		1473.56		50	0.224955
0.616132	0.210326		1605.06		60	0.210326
0.629738	0.20084		1700.79		70	0.20084
0.639456	0.194189		1773.58		80	0.194189
0.650146	0.186989		1858.33		90	0.186989
0.658892	0.181186		1931.62		100	0.181186
Pseudo-1st Order Sorption	dq/dt=k1 (qe-qt) -------->	log(qe-qt)= logqe-(k1/2.303)t
Pseudo-2nd Order Sorption	dq/dt=k2 (qo-qt)^2 -------->	t/qt=1/υo+(1/qe)t; υo = k2q2e
	Time	log(qe-qt), (mg/g)						ok
	5	0.844917
	10	0.793765						log (qe − qt ) = log qe − klager t / 2.303
	15	0.738864
	20	0.67955		t1/2 = 1.8 + 0.01
	25	0.606678						log qe = 1.0285
	30	0.536588						qe = 10.68
	40	0.360497						k = 0.043
	50	0.101528
	60	-0.0679327
	70	-0.234264
	80	-0.410355
	90	-0.757143
								ok
	t1/2	Uptake Capacity (mg/g), qe
	2.236	6.18076
	3.16	6.95821						qt=Rd(t)1/2
	3.872	7.69679
	4.472	8.3965
	5	9.13508						Rd = 0.421
	5.477	9.73761						Rd = 1.207
	6.324	10.8844
	7.071	11.9145
	7.746	12.3226
	8.366	12.5948
	8.944	12.7891
	9.486	13.0029
	10	13.1778
	Time	t/qt
	5	0.808962						ok
	10	1.43715
	15	1.94886
	20	2.38194						t/qt= 1/h+ (1/qe)t
	25	2.7367
	30	3.08084						h = k2qe2
	40	3.675
	50	4.19657						q = 14.79
	60	4.86909						h = 1.159
	70	5.55787						k2 = 5.3 x 10-3
	80	6.25532
	90	6.92152
	100	7.5885
		qt
Time	ln t	Uptake Capacity (mg/g), qe
5	1.60944	6.18076						ok
10	2.30259	6.95821
15	2.70805	7.69679						qt=β ln⁡(αβ)+ β ln⁡t
20	2.99573	8.3965
25	3.21888	9.13508
30	3.4012	9.73761						β = 2.671
40	3.68888	10.8844						α = 0.542
50	3.91202	11.9145
60	4.09434	12.3226
70	4.2485	12.5948
80	4.38203	12.7891
90	4.49981	13.0029
100	4.60517	13.1778

[truncated: 7 more sheets: kientic cont, kientic all, therm cont, thermo PES-NH2 in situ 20% AC-, thermo for PES-NH2 ex-situ  20%, Table, Sample Preparation (2)]
